# Supplementary material for: Different chlorine and hydroxyl radical environments impact m -xylene oxidation products
Source: Royal Society of Chemistry journal article supplement (doi:10.1039/d3ea00024a), 2023-01-01
Supplement: d3ea00024a1.pdf [file d3ea00024a1.pdf]

## Supporting Information: Different Chlorine and Hydroxyl Radical Environments Impact *m*-xylene Oxidation Products

Nirvan Bhattacharyya<sup>1</sup>, Mrinali Modi<sup>1</sup>, Leif G. Jahn<sup>1</sup>, and Lea Hildebrandt Ruiz<sup>1,\*</sup>

<sup>1</sup>Mcketta Department of Chemical Engineering, University of Texas at Austin, Austin, TX 78751

\*Corresponding author: [lhr@che.utexas.edu](mailto:lhr@che.utexas.edu)

### Modeled chamber spectra and potential model error

The blacklight spectrum used in the SAPRC model in this study is shown in Figure S1 alongside literature absorption cross sections<sup>1</sup> for radical precursors. Absorption spectra for ClNO<sub>2</sub> and H<sub>2</sub>O<sub>2</sub> fall in the tail of the blacklight emissions spectrum and small differences in the spectra would substantially alter the anticipated photolysis rate.

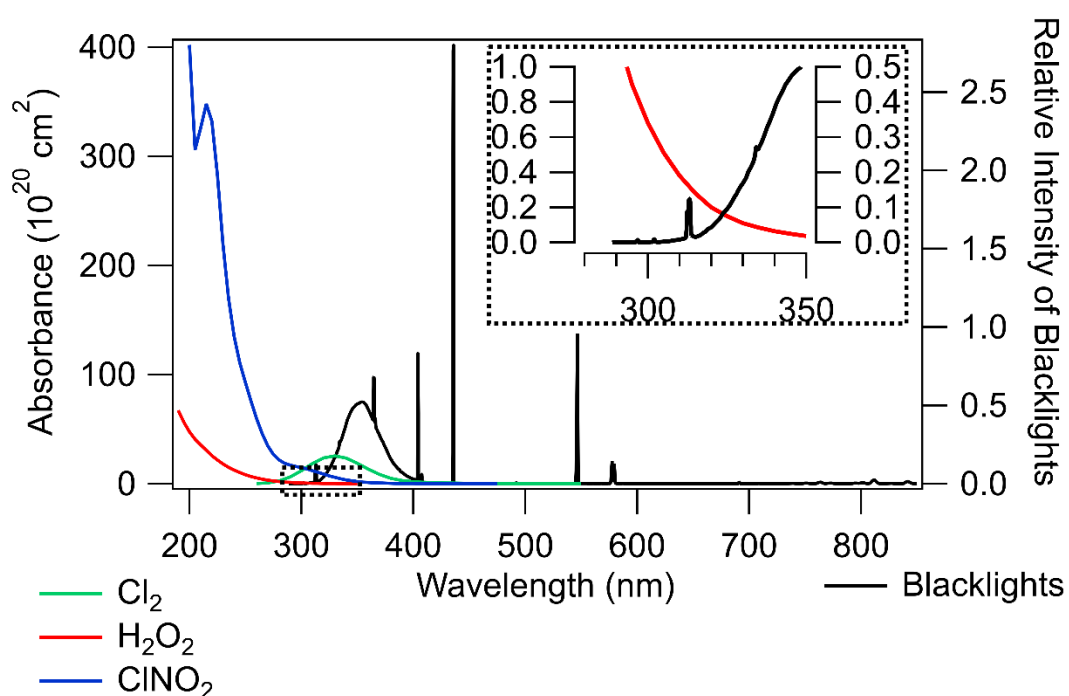

**Figure S1:** UV blacklight spectrum and relevant absorption cross sections. Inset shows small overlap between UV blacklight spectrum and H<sub>2</sub>O<sub>2</sub> absorption cross section.

### Experimental time series

Time series of radical precursors and key gas phase species are shown here for Experiments 3, 8, 9 and 10 in Figures S2-5.

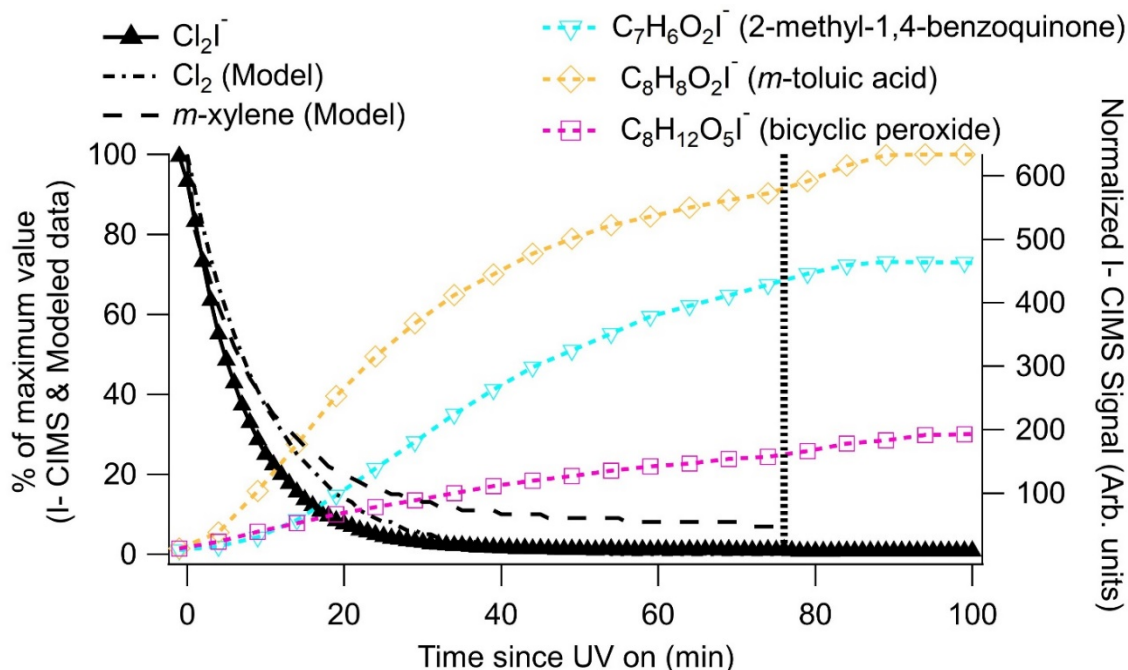

**Figure S2:** Experiment 3 ( $\text{Cl}_2 + \text{NO}$ ) precursor consumption and selected product formation. Dashed vertical line indicates end of illumination period.

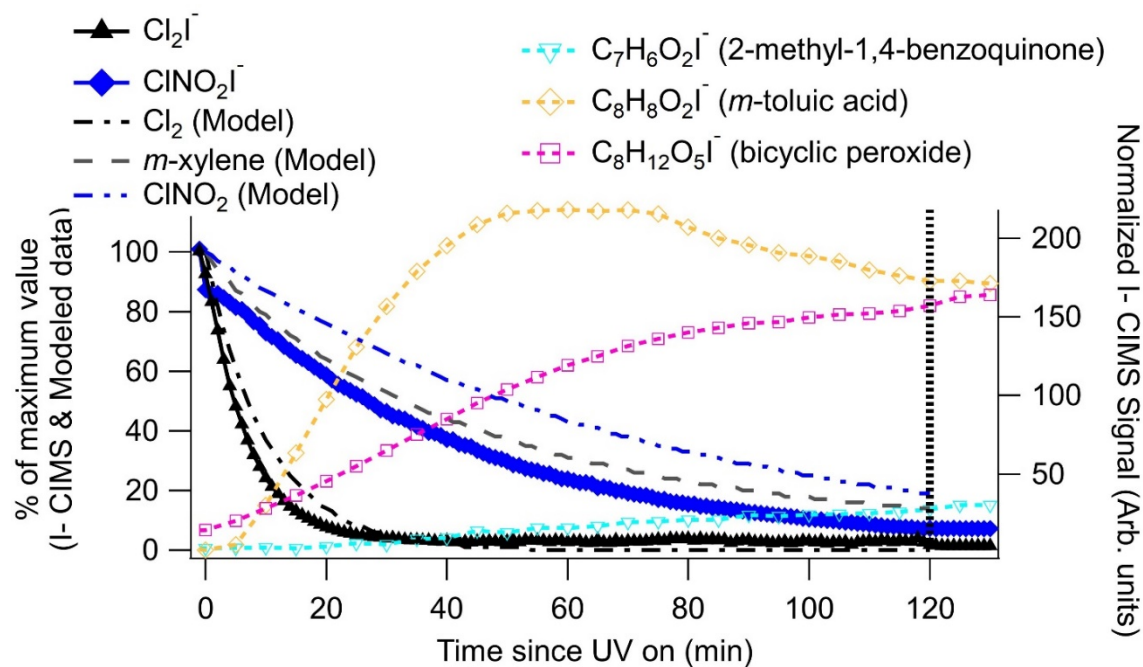

**Figure S3:** Experiment 8 ( $\text{Cl}_2 + \text{ClNO}_2$ ) precursor consumption and selected product formation. Dashed vertical line indicates end of illumination period.

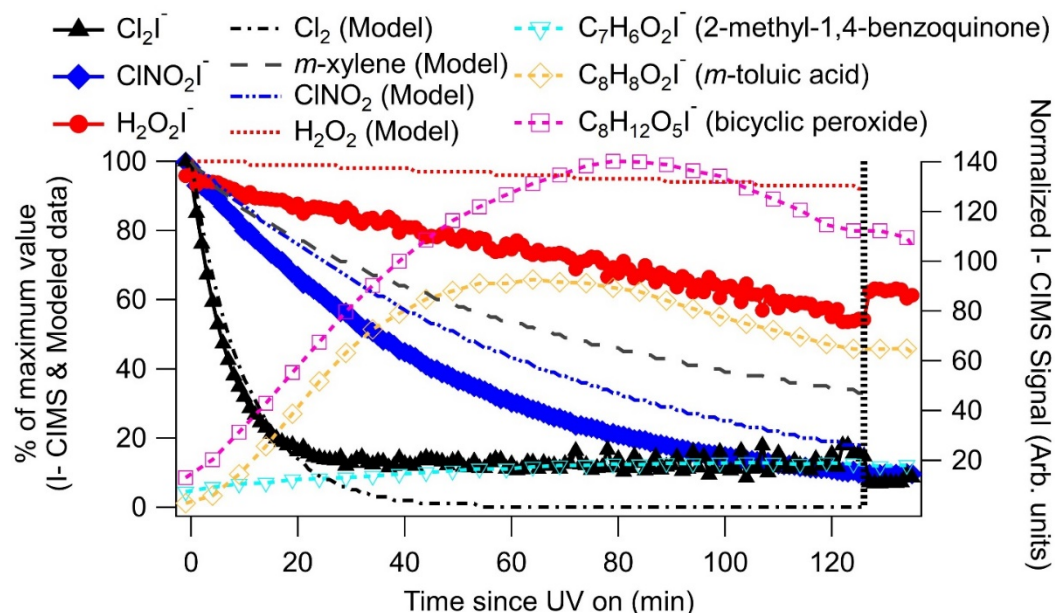

**Figure S4:** Experiment 10 (Cl<sub>2</sub> + ClNO<sub>2</sub> + H<sub>2</sub>O<sub>2</sub>) precursor consumption and selected product formation. Dashed vertical line indicates end of illumination period.

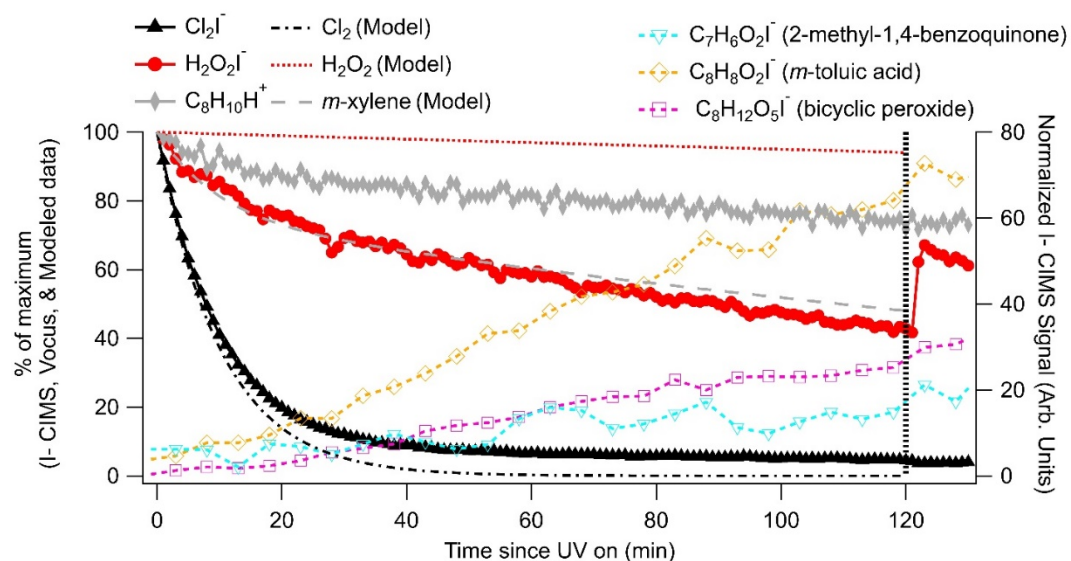

**Figure S5:** Experiment 9 (Cl<sub>2</sub> + H<sub>2</sub>O<sub>2</sub>) precursor consumption and selected product formation. Dashed vertical line indicates end of illumination period.

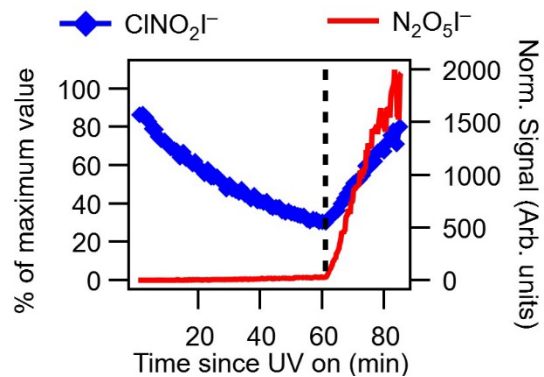

**Figure S6:** Experiment 1 ( $\text{ClONO}_2$ ) consumption of  $\text{ClONO}_2$  and nocturnal formation of  $\text{ClONO}_2$  and  $\text{N}_2\text{O}_5$

*Modeled and measured m-xylene consumption*

Chamber modeling and measured decay of *m*-xylene normalized to maximum concentration.

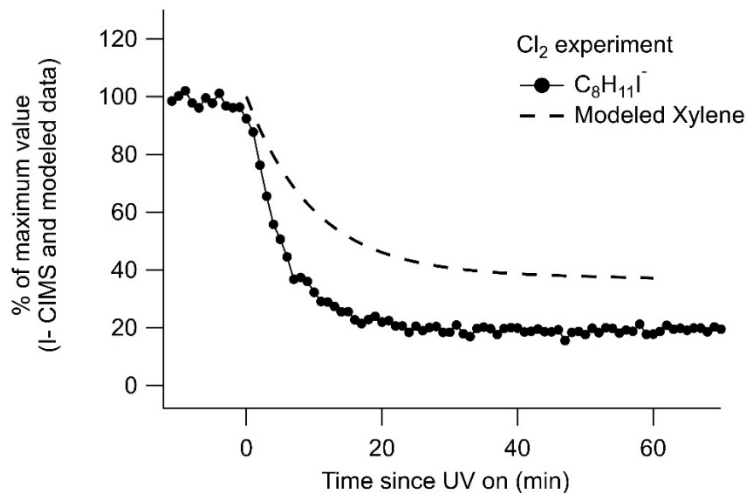

**Figure S7:** Experiment 4 consumption of *m*-xylene and chamber modeled consumption.

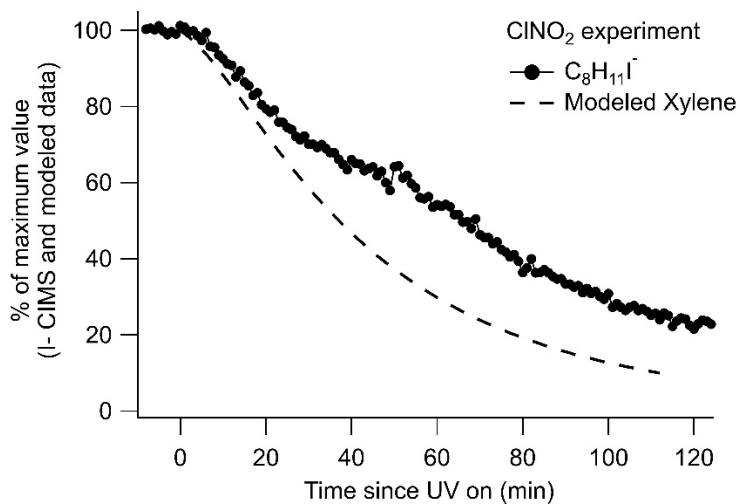

**Figure S8:** Experiment 2 consumption of m-xylene and chamber modeled consumption.

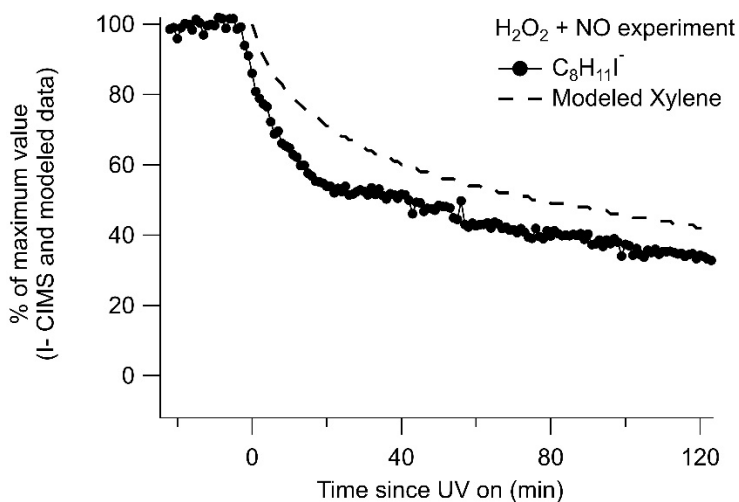

**Figure S9:** Experiment 6 consumption of m-xylene and chamber modeled consumption

## Modeled oxidant exposures

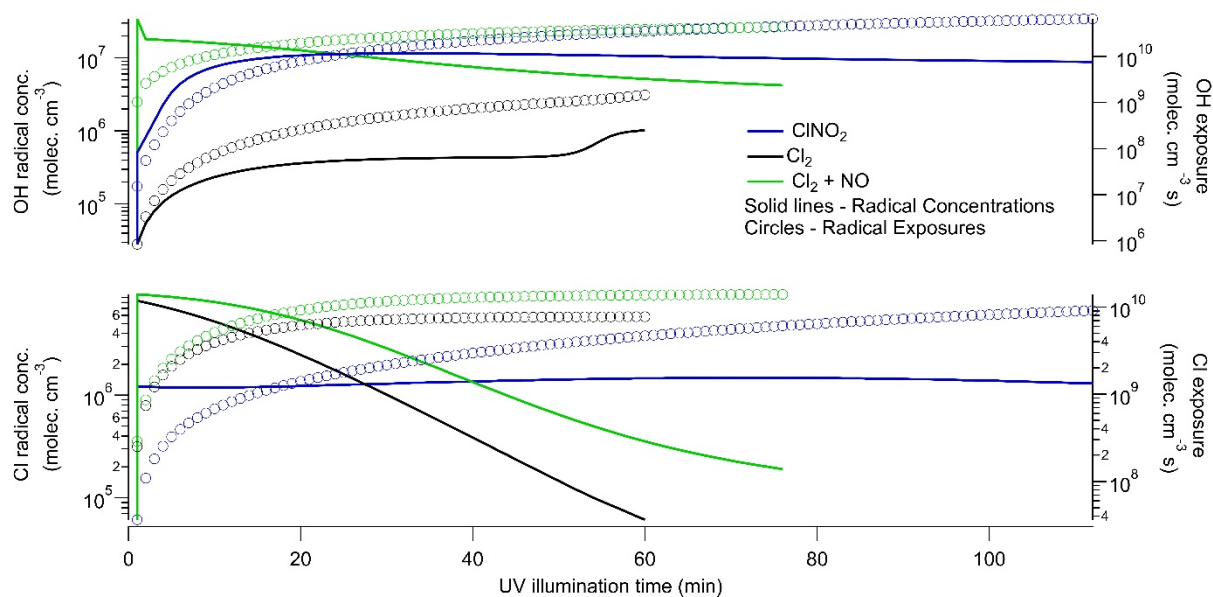

**Figure S10:** Modeled Cl and OH exposures for Cl radical precursor experiments.

## References

- 1 S. P. Sander, R. R. Friedl, D. M. Golden, M. J. Kurylo, G. K. Moortgat, P. H. Wine, a R. Ravishankara, C. E. Kolb, M. J. Molina, S. Diego, L. Jolla, R. E. Huie and V. L. Orkin, Chemical Kinetics and Photochemical Data for Use in Atmospheric Studies Evaluation Number 15, *Cross Sect.*, 2006, **California**, 1–153.
